# Supplementary material for: Bimetallic nanoparticles aligned at the tips of carbon nanotubesElectronic supplementary information available: XEDS spectrum of the sample prepared from [Ru5C(CO)14Pt(COD)]; Table listing reports on nanotubes decorated with nanoparticles from the literature; Suggested binding modes of clusters to MWNTs. See http://www.rsc.org/suppdata/cc/b1/b109923j/
Source: Royal Society of Chemistry journal article supplement (doi:10.1039/b109923j), 2002-01-23
Supplement: b109923j.doc [file b109923j.doc]

**Nanotubes decorated with nanoparticles reported in the literature**

| Metal | Deposition method | Size of the particles (nm) | Ref. |
| --- | --- | --- | --- |
| Pd | Obtained when filling closed MWNTs by the action of a nitric acid solution containing Pd(NO3)2. | 20 | 10 |
| Pt | Obtained when filling opened SWNTs with H2PtCl6.6H2O. | 3-20 | 11 |
| Ag | Obtained when filling opened MWNTs with Ag(NO3). | 3.5-8.5 | 12 |
| Pt | Nanoparticles formed inside the nanotubes by a template method using an anodic oxide film, with H2PtCl6.6H2O. | 2-5 or 30 | 13 |
| Ru | Adsorption of ruthenium 2,5-pentanedionate in toluene. | 3-7 | 14 |
| Au, Pt or Ag | Refluxing acid-treated nanotubes with HAuCl4, H2PtCl6 or AgNO3 in the presence of a reducing agent, or refluxing nanotubes with the metal compound and HNO3. | 1-7 | 15 |
| Pt | Deposition of PtCl2 onto functionalised nanotubes. | 10-20 | 16 |
| Cu or Ni | Electroless plating of sensitised-activated nanotubes. | 2-3 | 17 |

**Example of XEDS spectrum obtained with the sample prepared from [Ru5C(CO)14Pt(COD)]**


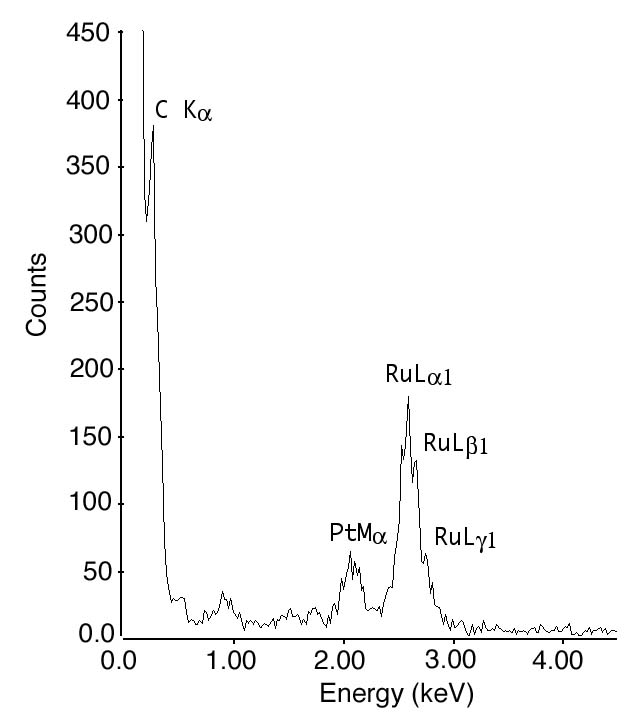


**Suggested binding modes of clusters to MWNTs**
